# Supplementary material for: Role of the dew water on the ground surface in HONO distribution: a case measurement in Melpitz
Source: Copernicus journal article supplement (doi:10.5194/acp-20-13069-2020), 2020-11-09
Supplement: Supplementary file 1 [file acp-20-13069-2020-supplement.pdf]

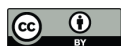

*Supplement of*

**Role of the dew water on the ground surface in HONO distribution: a case measurement in Melpitz**

**Yangang Ren et al.**

*Correspondence to:* Abdelwahid Mellouki ([abdelwahid.mellouki@cnrs-orleans.fr](mailto:abdelwahid.mellouki@cnrs-orleans.fr)) and Hartmut Herrmann ([herrmann@tropos.de](mailto:herrmann@tropos.de))

The copyright of individual parts of the supplement might differ from the CC BY 4.0 License.

### Intercomparison strategy:

To improve the understanding of the chosen intercomparison setup, we refer to the Fig. S1. In Fig. S1b, the MARGA PM<sub>10</sub> inlet is shown. This inlet was used for both instruments in the first measurement period to identify the inlet artifact. Therefore, the inlet tube was extended with a Y-connector (Fig. S1a) within the measurement container. The tube from the inlet to the connector had a length of approximately 2 m.

For the second intercomparison period the LOPAP inlet was set next to the MARGA inlet on the roof of the container. No interactions between LOPAP and MARGA inlet occurred.

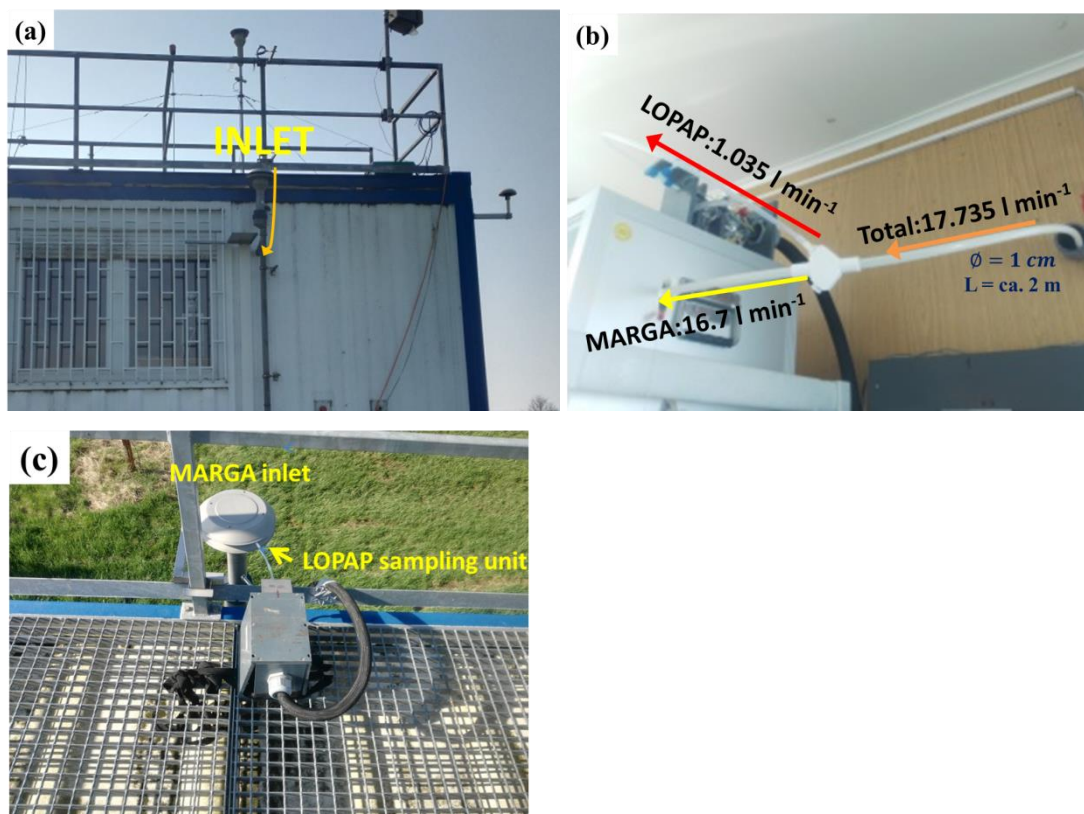

**Fig. S1.** (a) the sampling inlet of LOPAP and MARGA; (b) M1; sampling unit of LOPAP was connected in front of the WRD and in the back of the 2 m sampling inlet of MARGA (April 18<sup>th</sup>, 2018 13:00 UTC –April 20<sup>th</sup>, 2018 08:00 UTC); (c) M2; sampling unit of LOPAP was settled in the same level as the sampling head of MARGA (April 20<sup>th</sup>, 2018 15:00 UTC – April 29<sup>th</sup>, 2018 07:00 UTC).

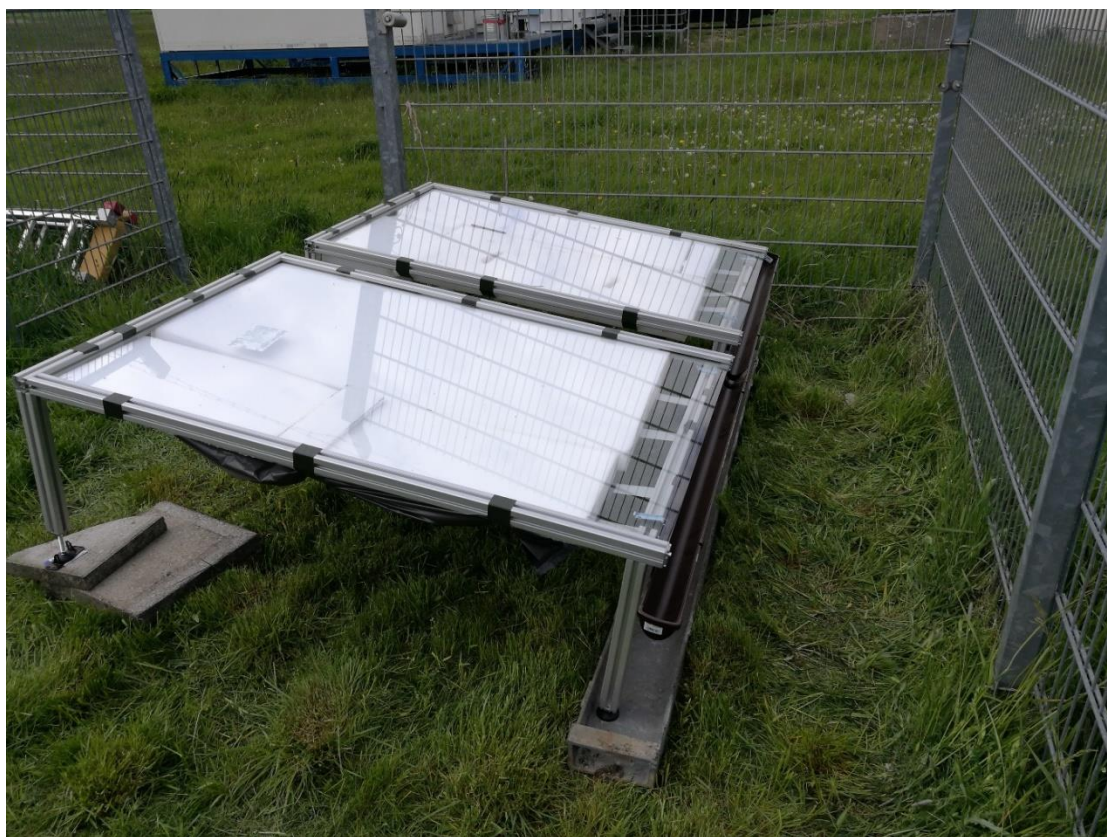

**Fig. S2.** The dew collector system: The glass sampler surface is  $1.0 \times 1.5 \text{ m}^2$ , and about 40 cm above ground at the lowest point.

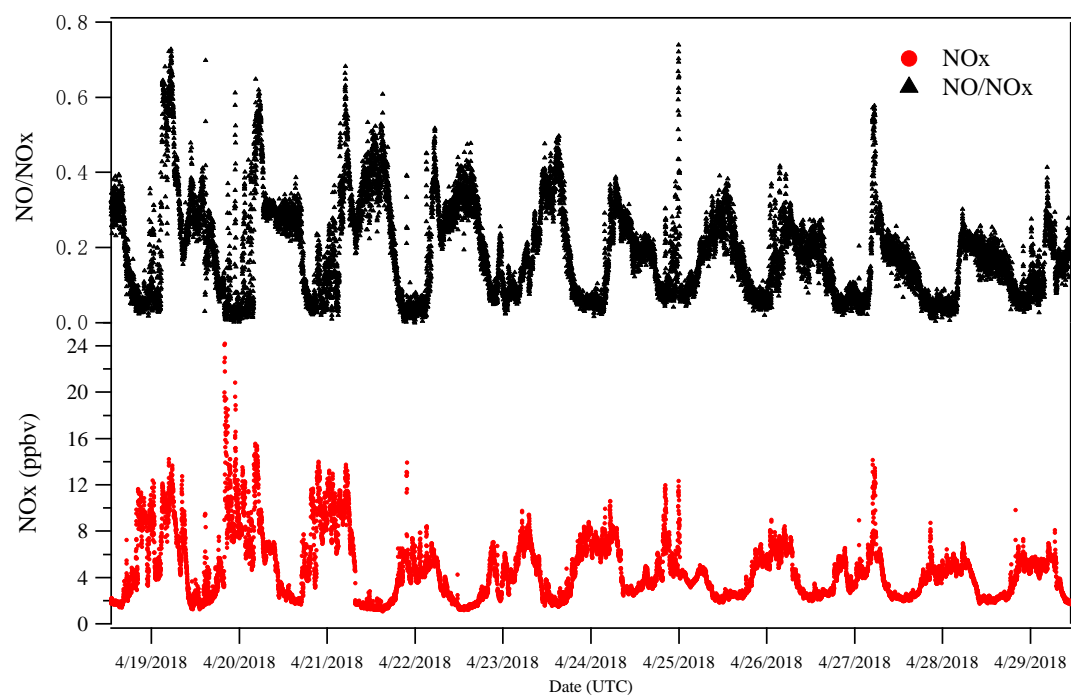

**Fig. S3.** Time profile of NO<sub>x</sub> and NO/NO<sub>x</sub> from April 19<sup>th</sup> to 29<sup>th</sup>, 2018.

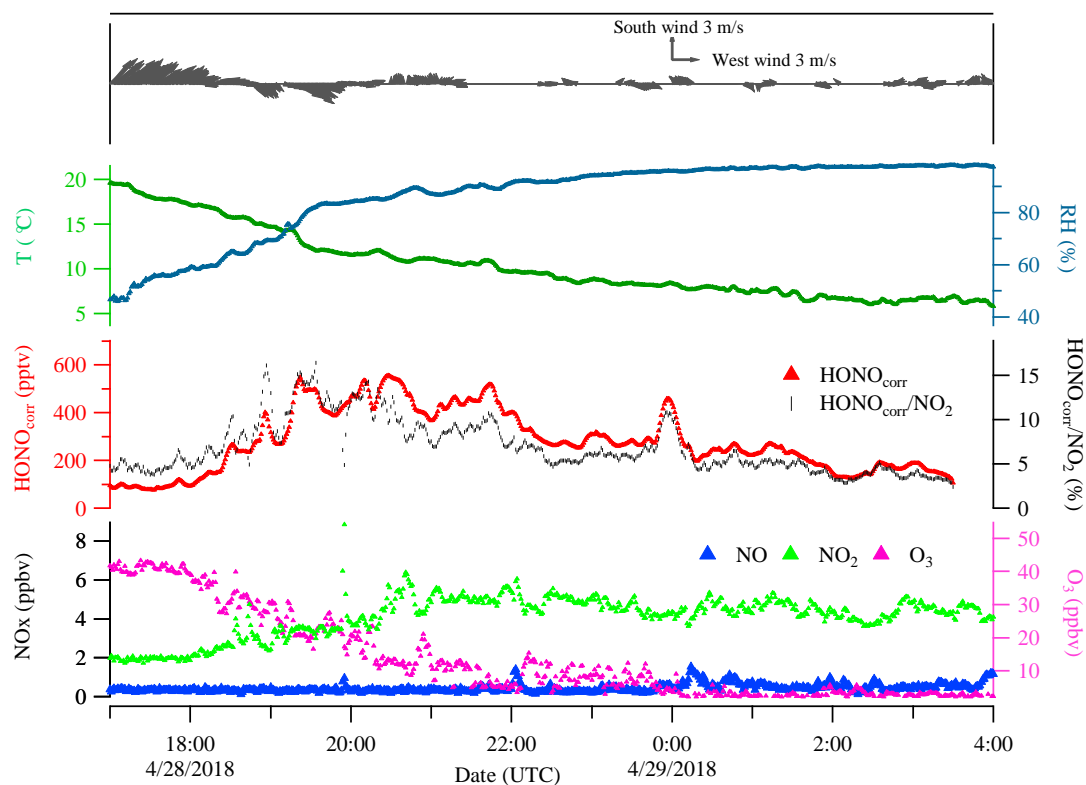

**Fig. S4.** A case of the determination of the heterogeneous NO<sub>2</sub>-to-HONO conversion frequency at night from April 28<sup>th</sup> until April 29<sup>th</sup> 2018.

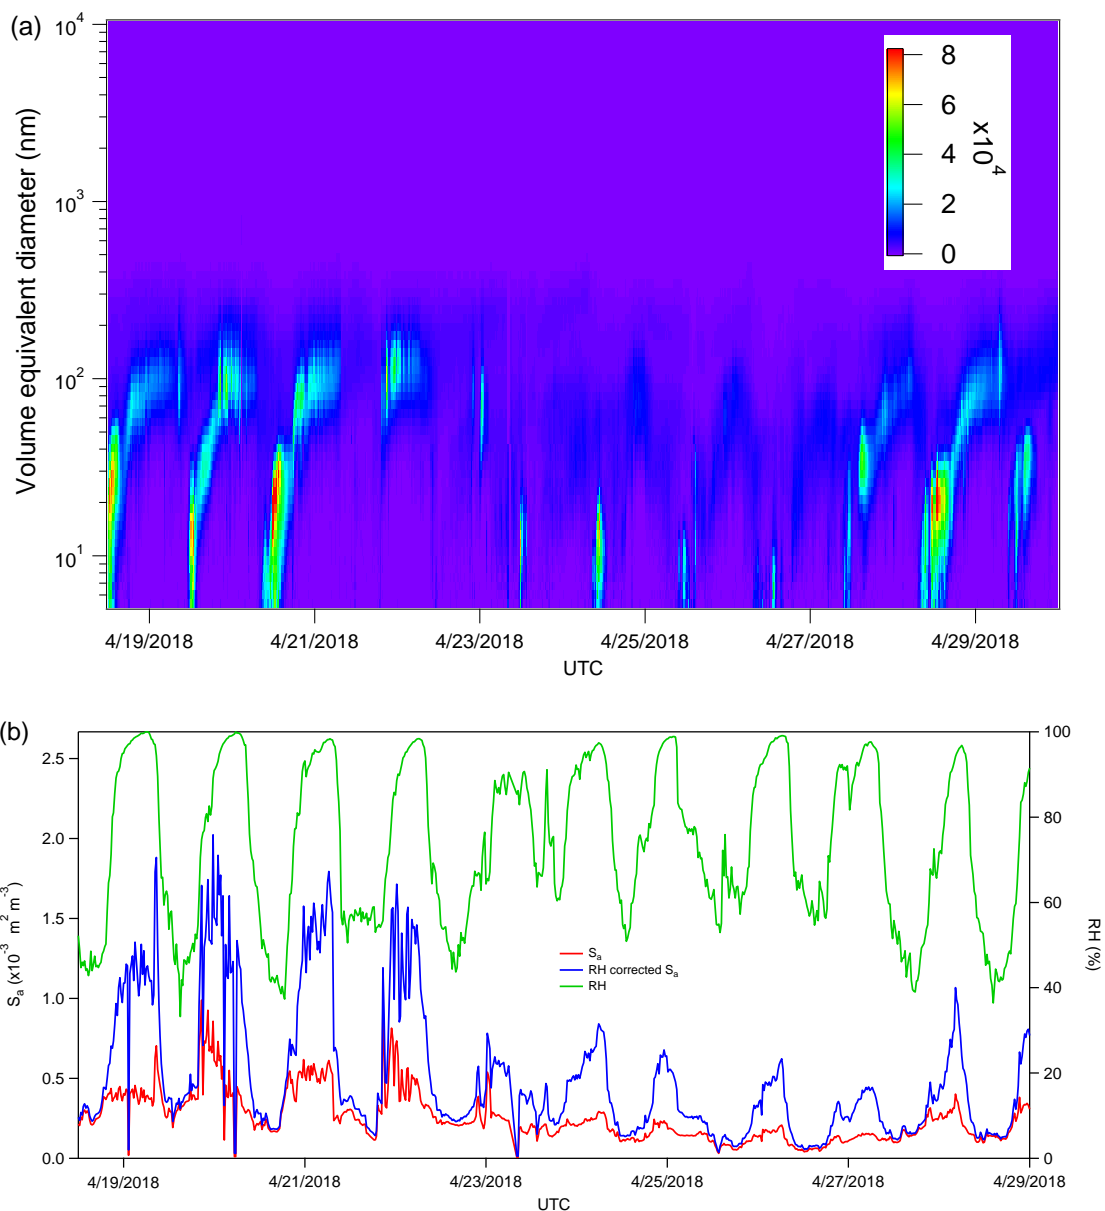

**Fig. S5.** (a) Particle size distribution ranged from 5 nm to 10  $\mu\text{m}$  of APSS and D-MPSS data. The mobility diameter is to be assumed to be identical to the volume equivalent diameter due to compact particles. The color code presents the particle number density. (b) The particle surface density  $S_a$  and RH corrected  $S_a$  value calculated from the particle size distribution for our field measurement period of April 19<sup>th</sup>-29<sup>th</sup> 2018.

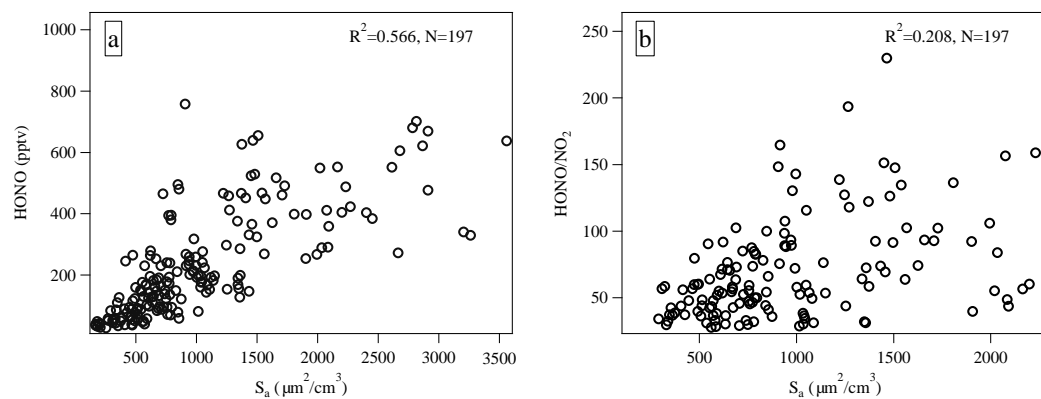

**Fig. S6.** Correlation between (a)  $\text{HONO}_{\text{corr}}$  and (b)  $\text{HONO}_{\text{corr}}/\text{NO}_2$  with particle surface density during the time interval of 17:30-22:00 (UTC) since the HONO concentration started to decrease from the midnight.

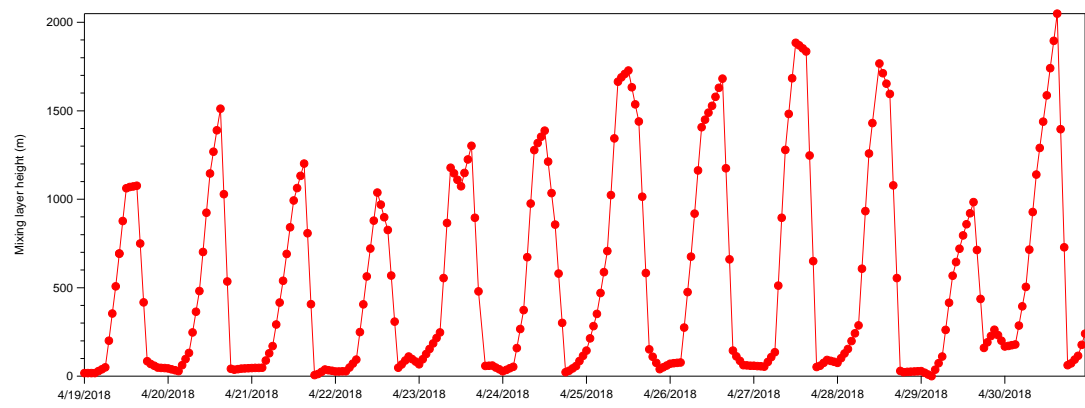

**Fig. S7.** Mixing layer height (H) in April 2018 calculated from the backward trajectory analysis based on GDAS data.



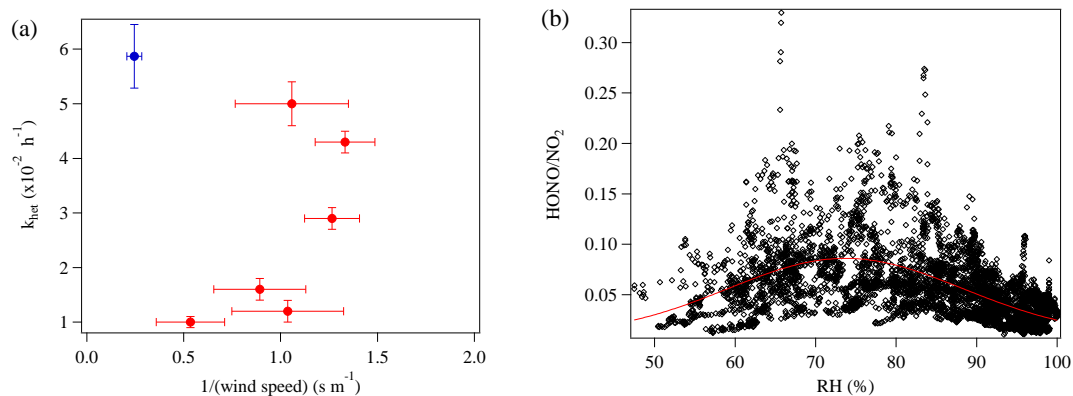

**Fig. S8.** Scatter plot of (a) NO<sub>2</sub>-HONO conversion frequency ( $k_{\text{het}}$ ) in Table 3 (in red) and also one data point (in blue) according to the second set of observation (mentioned in section 3.3 and Fig. 5) vs. the inverse of wind speed and (b) HONO/NO<sub>2</sub> against RH in the time interval of 18:00-04:00 (UTC) during the campaign period (April 19<sup>th</sup> to 29<sup>th</sup>, 2018).

### Investigating resistance limitations in transport of HONO and NO<sub>2</sub> to the ground surface during the Melpitz measurement

In order to assess limitations of NO<sub>2</sub> conversion and HONO deposition in the surface parameterizations derived for the Melpitz dataset, a simple resistance model according to the description provided by Seinfeld and Pandis (2006), which has been proposed by Huff and Abbatt (2002) (Equation S1) was set up.

$$v_d = \frac{1}{R_a + R_b + R_c} \quad (S1)$$

Here,  $v_d$  is the observed deposition velocity (cm s<sup>-1</sup>),  $R_a$  is the aerodynamic transport resistance (Equation S2),  $R_b$  is the molecular diffusion resistance (Equation S3) and  $R_c$  is the reactive loss resistance (Equation S4). Each term can be calculated as follows

$$R_a = \left(\frac{1}{\mu \kappa^2}\right) \left[\ln\left(\frac{z}{z_0}\right)\right]^2 \quad (S2)$$

$$R_b = \frac{z_0}{D} \quad (S3)$$

$$R_c = \frac{4}{\gamma c} \quad (S4)$$

Where  $\kappa$  is the von Kármán constant (0.4) (VandenBoer et al., 2013),  $\mu$  is the wind speed as 0.1 - 6 m s<sup>-1</sup> in the present study,  $z_0$  is an estimate of the roughness length of the surface (~ 0.03 m according to a 0.3 m grass height),  $z$  represents the surface layer height and is set to 15 m as example for nighttime values in Melpitz. Values for the local surface roughness length and surface layer height were approximated for atmospheric conditions with wind speeds less than 6 m s<sup>-1</sup> (Huff and Abbatt, 2002; Seinfeld and Pandis, 2006).  $D$  is the molecular diffusivity of HONO and NO<sub>2</sub> as  $5.7 \times 10^{-5}$  and  $1.5 \times 10^{-5}$  m<sup>2</sup> s<sup>-1</sup>, respectively, at 760 Torr (Hirokawa et al., 2008; Langenberg et al., 2019),  $\gamma$  is the reactive uptake coefficient and  $c$  is the mean molecular speed (~ 367 m s<sup>-1</sup> for HONO and NO<sub>2</sub>). These values were derived assuming that the upper limit to the observed HONO reactive uptake was limited equally by molecular diffusion and aerodynamic transport (Equation S1).

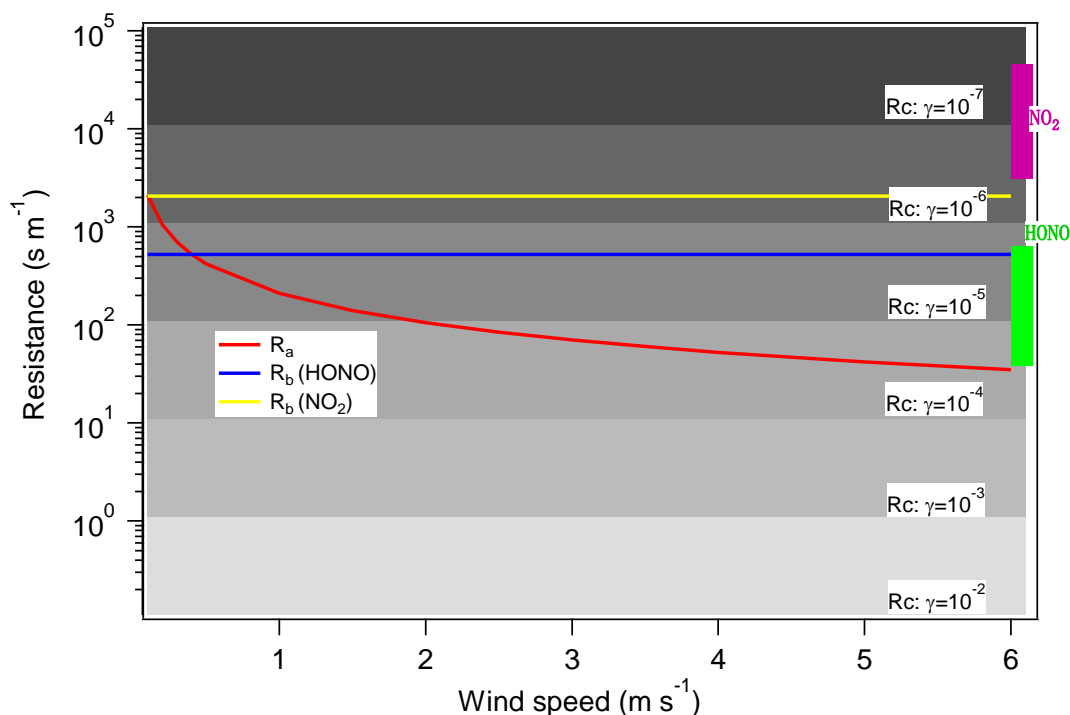

**Fig. S9.** Estimated contributions of resistance parameters to the observable ground surface processes for the HONO and NO<sub>2</sub> uptake values derived from Melpitz station. A series of grey shaded regions define the borders of the reactive uptake resistance ( $R_c$ ), the  $R_c$  values calculated from upper and lower limit uptake values of HONO and NO<sub>2</sub> in this work are shown in green and pink column, respectively. The aerodynamic transport resistance ( $R_a$ , red line) and diffusion resistance ( $R_b$ , blue line for HONO and yellow for NO<sub>2</sub>) are shown in the Figure.”

Figure S9 shows the results of the calculated resistances using data limitations from the observation data set and compared to the observed range for HONO and NO<sub>2</sub> in Melpitz. This result presents that the aerodynamic transport resistance increases with decreasing windspeed and could play the main role for the HONO deposition when the wind speed was less than 0.5 m s<sup>-1</sup>. Regarding on the calculated  $R_c$  range (region indicated by green bar) using the reactive uptake values observed for HONO ( $1.7 \times 10^{-5}$  to  $2.8 \times 10^{-4}$ ), limitation of the observed uptake of HONO was potentially significant from the molecular diffusion resistance term in the data range at wind speeds larger than  $\sim 1$  m s<sup>-1</sup>. Therefore, the range of HONO uptake coefficient values calculated in this investigation are potentially limited by a combination of both transport and diffusion to the ground surface. Since such limitations are realistic for the atmosphere, the  $\gamma$ -coefficients calculated here could have a broad scale applicability used for simulation of HONO production and loss at night when constrained by the observations. As shown in Fig. S9, the  $R_c$  range (region indicated by pink bar) calculated based on the reactive uptake values observed for NO<sub>2</sub> ( $2.4 \times 10^{-7}$  to  $3.5 \times 10^{-6}$ ) indicate limitation by the reactive

uptake process, which may play the main role rather than aerodynamic transport limitations and molecular diffusion limitations.

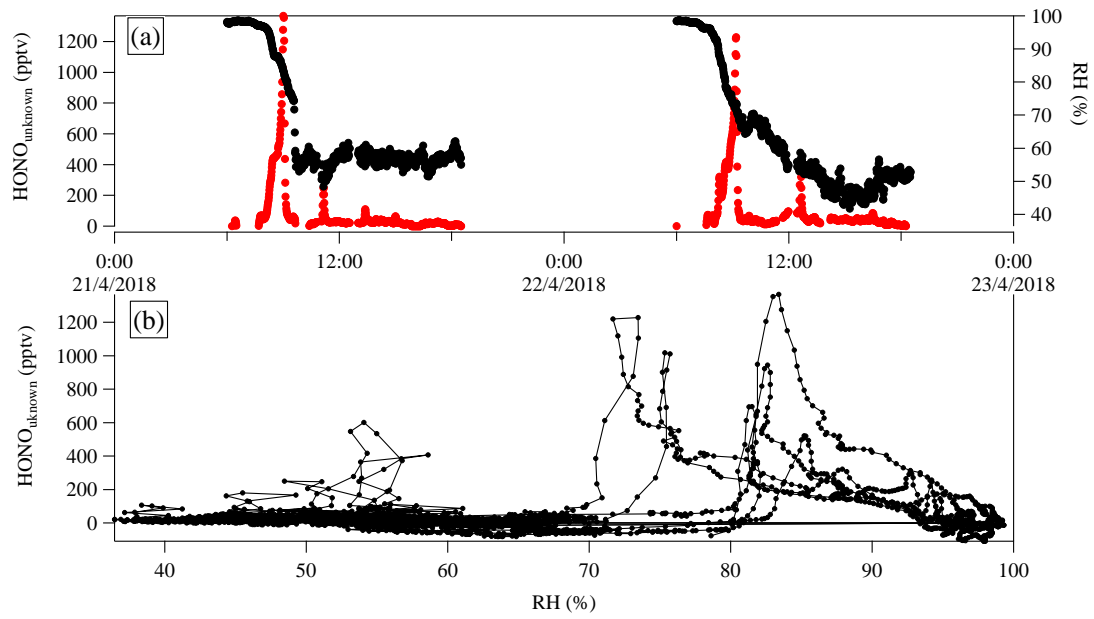

**Fig. S10.** (a) Example of time-profile of HONO and RH for the date April 21<sup>st</sup> to 22<sup>th</sup> to show that rapid humidity changes result in the release of HONO; (b) the HONO<sub>unknown</sub> as a function of RH (%) during daytime in the period of April 20<sup>th</sup> to 29<sup>th</sup>, 2018; HONO<sub>unknown</sub> was obtained by subtracting modeled HONO (HONO\_Model4) from the measured HONO.

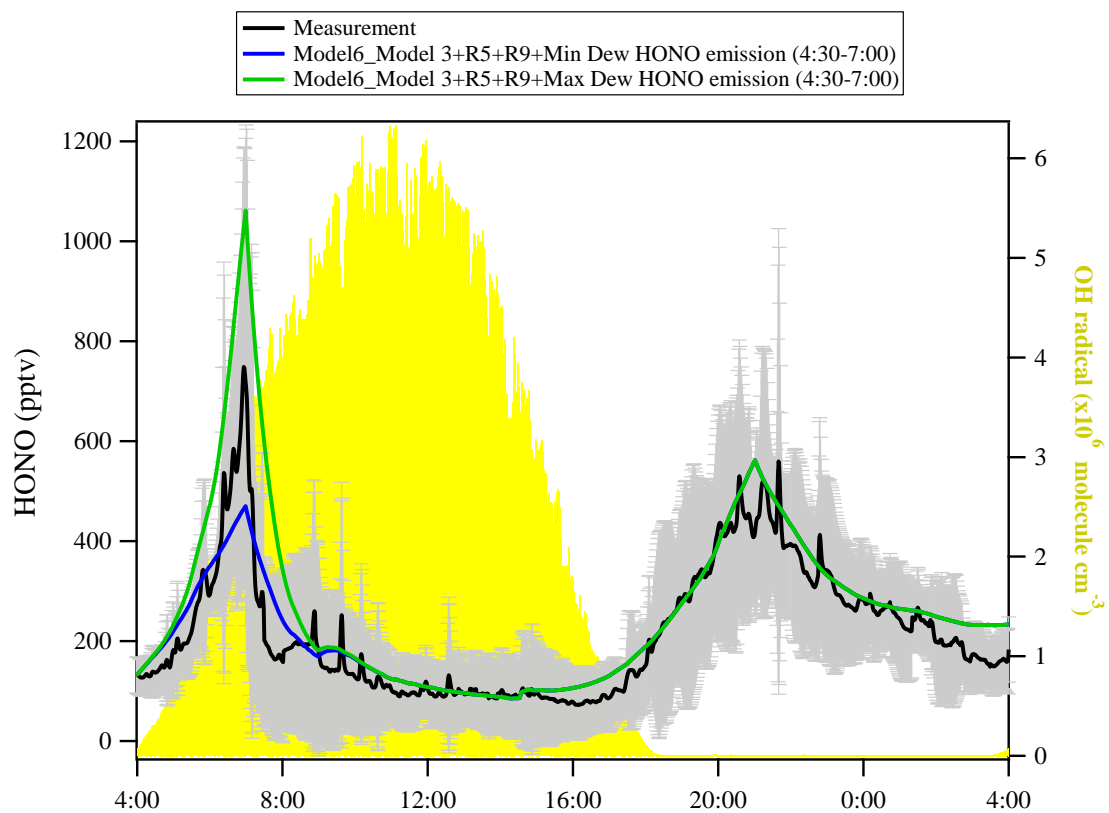

**Fig. S11.** Observed average HONO atmospheric concentration (black line,  $\pm 1\sigma$  in shaded area) and the calculated HONO concentration in model 6 using a min dew HONO emission  $k_{\text{emission}} = 0.006 \text{ pptv } \%^{-1} \text{ s}^{-1}$  (blue line) and max dew HONO emission  $k_{\text{emission}} = 0.026 \text{ pptv } \%^{-1} \text{ s}^{-1}$  (green line), respectively.

## Reference

- Hirokawa, J., Kato, T., and Mafuné F.: Uptake of Gas-Phase Nitrous Acid by pH-Controlled Aqueous Solution Studied by a Wetted Wall Flow Tube, *The Journal of Physical Chemistry A*, 112, 12143-12150, 10.1021/jp8051483, 2008.
- Huff, A. K., and Abbatt, J. P. D.: Kinetics and Product Yields in the Heterogeneous Reactions of HOBr with Ice Surfaces Containing NaBr and NaCl, *The Journal of Physical Chemistry A*, 106, 5279-5287, 10.1021/jp014296m, 2002.
- Langenberg, S., Carstens, T., Hupperich, D., Schweighoefer, S., and Schurath, U.: Technical note: Determination of binary gas phase diffusion coefficients of unstable and adsorbing atmospheric trace gases at low temperature – Arrested Flow and Twin Tube method, *Atmos. Chem. Phys. Discuss.*, 2019, 1-24, 10.5194/acp-2019-1050, 2019.
- Seinfeld, J. H., and Pandis, S. N.: *Atmospheric Chemistry and Physics: From Air Pollution to Climate Change*, Wiley, 2006.
- VandenBoer, T. C., Brown, S. S., Murphy, J. G., Keene, W. C., Young, C. J., Pszenny, A. A. P., Kim, S., Warneke, C., de Gouw, J. A., Maben, J. R., Wagner, N. L., Riedel, T. P., Thornton, J. A., Wolfe, D. E., Dubé W. P., Öztürk, F., Brock, C. A., Grossberg, N., Lefer, B., Lerner, B., Middlebrook, A. M., and Roberts, J. M.: Understanding the role of the ground surface in HONO vertical structure: High resolution vertical profiles during NACHTT-11, *J. Geophys. Res. Atmos.*, 118, 10,155-110,171, doi:10.1002/jgrd.50721, 2013.
